# Supplementary material
Source: MDPI journal article supplement (https://www.mdpi.com/2076-3417/12/22/11759)
Supplement: s1 [file s1]

**Table S1.** The biomechanical analysis of the five finite element models in flexion.

|                                         | INT   |       | Nt45  |       | Nt35  |       | Nt25  |       | Nt15  |       |
|-----------------------------------------|-------|-------|-------|-------|-------|-------|-------|-------|-------|-------|
| Preload (N)                             | 150   |       |       |       |       |       |       |       |       |       |
| Moment (Nm)                             | 14.4  |       | 18.7  |       | 18.7  |       | 18.7  |       | 18.4  |       |
| Intervertebral range of motion (degree) |       |       |       |       |       |       |       |       |       |       |
| L1-L2                                   | 5.39  |       | 6.43  |       | 6.43  |       | 6.43  |       | 6.35  |       |
| L2-L3                                   | 5.71  |       | 6.81  |       | 6.81  |       | 6.81  |       | 6.72  |       |
| L3-L4                                   | 5.71  |       | 2.28  |       | 2.31  |       | 2.38  |       | 2.47  |       |
| L4-L5                                   | 7.28  |       | 8.60  |       | 8.60  |       | 8.60  |       | 8.51  |       |
| Total                                   | 24.09 |       | 24.12 |       | 24.15 |       | 24.22 |       | 24.05 |       |
| Stress of intervertebral disc (Kpa)     |       |       |       |       |       |       |       |       |       |       |
| L1-L2                                   | 1080  |       | 1220  |       | 1220  |       | 1230  |       | 1270  |       |
| L2-L3                                   | 893   |       | 1130  |       | 1130  |       | 1110  |       | 1110  |       |
| L3-L4                                   | 810   |       | 543   |       | 547   |       | 548   |       | 559   |       |
| L4-L5                                   | 959   |       | 1200  |       | 1200  |       | 1180  |       | 1180  |       |
| Facet contact forces (N)                |       |       |       |       |       |       |       |       |       |       |
|                                         | Left  | Right |
| L1-L2                                   | 0     | 0     | 0     | 0     | 0     | 0     | 0     | 0     | 0     | 0     |
| L2-L3                                   | 0     | 0     | 0     | 0     | 0     | 0     | 0     | 0     | 0     | 0     |
| L3-L4                                   | 0     | 0     | 0     | 0     | 0     | 0     | 0     | 0     | 0     | 0     |
| L4-L5                                   | 0     | 0     | 0     | 0     | 0     | 0     | 0     | 0     | 0     | 0     |
| Stress of screws (MPa)                  |       |       |       |       |       |       |       |       |       |       |
| Maximum                                 | -     |       | 139   |       | 140   |       | 134   |       | 130   |       |
| Stress of PCU shell (Mpa)               |       |       |       |       |       |       |       |       |       |       |
| Maximum                                 | -     |       | 4.7   |       | 3     |       | 3.5   |       | 4.9   |       |
| Stress of Nitinol stick (Mpa)           |       |       |       |       |       |       |       |       |       |       |
| Maximum                                 | -     |       | 44    |       | 54.6  |       | 72.4  |       | 118   |       |

**Table S2.** The biomechanical analysis of the five finite element models in extension.

|                                         | INT   |       | Nt45  |       | Nt35  |       | Nt25  |       | Nt15  |       |
|-----------------------------------------|-------|-------|-------|-------|-------|-------|-------|-------|-------|-------|
| Preload (N)                             | 150   |       |       |       |       |       |       |       |       |       |
| Moment (Nm)                             | 15.1  |       | 18.4  |       | 18.4  |       | 18.4  |       | 18    |       |
| Intervertebral range of motion (degree) |       |       |       |       |       |       |       |       |       |       |
| L1-L2                                   | 3.33  |       | 3.86  |       | 3.86  |       | 3.86  |       | 3.80  |       |
| L2-L3                                   | 3.17  |       | 3.65  |       | 3.65  |       | 3.65  |       | 3.60  |       |
| L3-L4                                   | 2.85  |       | 1.09  |       | 1.12  |       | 1.18  |       | 1.24  |       |
| L4-L5                                   | 3.27  |       | 3.97  |       | 3.95  |       | 3.97  |       | 3.88  |       |
| Total                                   | 12.62 |       | 12.57 |       | 12.58 |       | 12.66 |       | 12.52 |       |
| Stress of intervertebral disc (Kpa)     |       |       |       |       |       |       |       |       |       |       |
| L1-L2                                   | 475   |       | 542   |       | 542   |       | 542   |       | 533   |       |
| L2-L3                                   | 488   |       | 556   |       | 556   |       | 556   |       | 548   |       |
| L3-L4                                   | 414   |       | 236   |       | 236   |       | 239   |       | 240   |       |
| L4-L5                                   | 312   |       | 439   |       | 436   |       | 439   |       | 430   |       |
| Facet contact forces (N)                |       |       |       |       |       |       |       |       |       |       |
|                                         | Left  | Right |
| L1-L2                                   | 76    | 76    | 95    | 95    | 95    | 95    | 95    | 95    | 93    | 93    |
| L2-L3                                   | 94    | 94    | 117   | 117   | 118   | 118   | 118   | 118   | 115   | 115   |
| L3-L4                                   | 105   | 105   | 6     | 5     | 7     | 7     | 11    | 11    | 14    | 15    |
| L4-L5                                   | 102   | 102   | 129   | 128   | 128   | 128   | 128   | 128   | 125   | 125   |
| Stress of screws (MPa)                  |       |       |       |       |       |       |       |       |       |       |
| Maximum                                 | -     |       | 105   |       | 110   |       | 112   |       | 110   |       |
| Stress of PCU shell (Mpa)               |       |       |       |       |       |       |       |       |       |       |
| Maximum                                 | -     |       | 5.1   |       | 2.7   |       | 3.1   |       | 4.9   |       |
| Stress of Nitinol stick (Mpa)           |       |       |       |       |       |       |       |       |       |       |
| Maximum                                 | -     |       | 39.5  |       | 46    |       | 58.4  |       | 101   |       |

**Table S3.** The biomechanical analysis of the five finite element models in torsion.

|                                         | INT   | Nt45  | Nt35  | Nt25  | Nt15  |       |      |       |      |       |
|-----------------------------------------|-------|-------|-------|-------|-------|-------|------|-------|------|-------|
| Preload (N)                             | 150   |       |       |       |       |       |      |       |      |       |
| Moment (Nm)                             | 29.0  | 31.9  | 31.3  | 30.2  | 29.6  |       |      |       |      |       |
| Intervertebral range of motion (degree) |       |       |       |       |       |       |      |       |      |       |
| L1-L2                                   | 3.85  | 4.13  | 4.07  | 3.96  | 3.91  |       |      |       |      |       |
| L2-L3                                   | 4.08  | 4.28  | 4.24  | 4.16  | 4.12  |       |      |       |      |       |
| L3-L4                                   | 4.60  | 3.79  | 4.01  | 4.22  | 4.40  |       |      |       |      |       |
| L4-L5                                   | 6.27  | 6.62  | 6.55  | 6.41  | 6.33  |       |      |       |      |       |
| Total                                   | 18.80 | 18.82 | 18.87 | 18.75 | 18.76 |       |      |       |      |       |
| Stress of intervertebral disc (Kpa)     |       |       |       |       |       |       |      |       |      |       |
| L1-L2                                   | 683   | 740   | 728   | 707   | 694   |       |      |       |      |       |
| L2-L3                                   | 678   | 722   | 722   | 687   | 675   |       |      |       |      |       |
| L3-L4                                   | 751   | 611   | 611   | 696   | 731   |       |      |       |      |       |
| L4-L5                                   | 927   | 1020  | 1020  | 968   | 950   |       |      |       |      |       |
| Facet contact forces (N)                |       |       |       |       |       |       |      |       |      |       |
|                                         | Left  | Right | Left  | Right | Left  | Right | Left | Right | Left | Right |
| L1-L2                                   | 0     | 336   | 0     | 371   | 0     | 363   | 0    | 349   | 0    | 342   |
| L2-L3                                   | 0     | 336   | 0     | 374   | 0     | 366   | 0    | 351   | 0    | 343   |
| L3-L4                                   | 0     | 336   | 0     | 213   | 0     | 245   | 0    | 285   | 0    | 323   |
| L4-L5                                   | 0     | 344   | 0     | 389   | 0     | 380   | 0    | 363   | 0    | 354   |
| Stress of screws (MPa)                  |       |       |       |       |       |       |      |       |      |       |
| Maximum                                 | -     | 211   | 162   | 107   | 98.9  |       |      |       |      |       |
| Stress of PCU shell (Mpa)               |       |       |       |       |       |       |      |       |      |       |
| Maximum                                 | -     | 17.4  | 7.6   | 6     | 4.6   |       |      |       |      |       |
| Stress of Nitinol stick (Mpa)           |       |       |       |       |       |       |      |       |      |       |
| Maximum                                 | -     | 219   | 324   | 383   | 381   |       |      |       |      |       |

**Table S4.** The biomechanical analysis of the five finite element models in lateral bending.

|                                         | INT   |       | Nt45  |       | Nt35  |       | Nt25  |       | Nt15  |       |
|-----------------------------------------|-------|-------|-------|-------|-------|-------|-------|-------|-------|-------|
| Preload (N)                             | 150   |       |       |       |       |       |       |       |       |       |
| Moment (Nm)                             | 19.1  |       | 23.2  |       | 23.2  |       | 23.2  |       | 22.6  |       |
| Intervertebral range of motion (degree) |       |       |       |       |       |       |       |       |       |       |
| L1-L2                                   | 6.12  |       | 7.25  |       | 7.25  |       | 7.24  |       | 7.10  |       |
| L2-L3                                   | 6.12  |       | 7.15  |       | 7.15  |       | 7.14  |       | 7.01  |       |
| L3-L4                                   | 6.17  |       | 2.63  |       | 2.77  |       | 2.96  |       | 3.16  |       |
| L4-L5                                   | 6.45  |       | 7.79  |       | 7.78  |       | 7.76  |       | 7.62  |       |
| Total                                   | 24.86 |       | 24.82 |       | 24.95 |       | 25.10 |       | 24.89 |       |
| Stress of intervertebral disc (Kpa)     |       |       |       |       |       |       |       |       |       |       |
| L1-L2                                   | 1230  |       | 1510  |       | 1500  |       | 1500  |       | 1470  |       |
| L2-L3                                   | 1160  |       | 1440  |       | 1430  |       | 1430  |       | 1400  |       |
| L3-L4                                   | 1130  |       | 512   |       | 544   |       | 585   |       | 621   |       |
| L4-L5                                   | 1040  |       | 1320  |       | 1320  |       | 1320  |       | 1290  |       |
| Facet contact forces (N)                |       |       |       |       |       |       |       |       |       |       |
|                                         | Left  | Right |
| L1-L2                                   | 21    | 5     | 30    | 10    | 30    | 10    | 30    | 9     | 28    | 9     |
| L2-L3                                   | 53    | 31    | 82    | 38    | 82    | 37    | 80    | 35    | 74    | 33    |
| L3-L4                                   | 41    | 9     | 0     | 0     | 0     | 0     | 1     | 0     | 9     | 0     |
| L4-L5                                   | 55    | 0     | 61    | 0     | 61    | 0     | 61    | 0     | 59    | 0     |
| Stress of screws (MPa)                  |       |       |       |       |       |       |       |       |       |       |
| Maximum                                 | -     |       | 158   |       | 178   |       | 181   |       | 175   |       |
| Stress of PCU shell (Mpa)               |       |       |       |       |       |       |       |       |       |       |
| Maximum                                 | -     |       | 6.8   |       | 5.1   |       | 5     |       | 7.2   |       |
| Stress of Nitinol stick (Mpa)           |       |       |       |       |       |       |       |       |       |       |
| Maximum                                 | -     |       | 127   |       | 145   |       | 187   |       | 275   |       |
